# Supplementary material for: Identifying source of predictability for vapor pressure deficit variability in the southwestern United States
Source: Research Square preprint supplement (doi:10.21203/rs.3.rs-5506614/v1), 2025-03-28
Supplement: Supplementary file 1 [file 74d15feb55a2423ab37bcce5.pdf]

**Supplementary materials for**

**Identifying source of predictability for vapor pressure deficit  
variability in the southwestern United States**

**Jiale Lou <sup>1</sup>, Youngji Joh <sup>2</sup>, Thomas L Delworth <sup>2</sup>, and Liwei Jia <sup>2</sup>**

<sup>1</sup>Atmospheric and Oceanic Sciences Program, Princeton University, Princeton, NJ, USA.

<sup>2</sup>Geophysical Fluid Dynamics Laboratory/NOAA, 201 Forrestal Road, Princeton, NJ, USA.

Corresponding author: Jiale Lou

Email address: [jiale.lou@noaa.gov](mailto:jiale.lou@noaa.gov)

Supplementary Table 1: The 12 CMIP6 pre-industrial control simulations used in this study.

| Model name  | Length<br>(years) | Period<br>(YYYYMM) | Ensemble | Reference                  |
|-------------|-------------------|--------------------|----------|----------------------------|
| BCC-CSM2-MR | 600               | 185001-244912      | rlilp1f1 | Wu et al., (2018)          |
| CanESM5     | 1000              | 520101-620012      | rlilp1f1 | Swart et al., (2019)       |
| CESM2       | 1200              | 000101-120012      | rlilp1f1 | Danabasoglu et al., (2020) |
| CESM2-WACCM | 499               | 000101-049912      | rlilp1f1 | Danabasoglu et al., (2020) |
| GFDL-CM4    | 500               | 015101-065012      | rlilp1f1 | Held et al., (2019)        |
| GFDL-ESM4   | 500               | 000101-050012      | rlilp1f1 | Krasting et al., (2018)    |
| GISS-E2-1-G | 851               | 415001-500012      | rlilp1f1 | Kelley et al., (2020)      |
| GISS-E2-1-H | 801               | 318001-398012      | rlilp1f1 | Kelley et al., (2020)      |
| MIROC6      | 800               | 320001-399912      | rlilp1f1 | Tatebe et al., (2019)      |
| MRI-ESM2-0  | 701               | 185001-255012      | rlilp1f1 | Yukimoto et al., (2019)    |
| SAM0-UNICON | 700               | 000101-070012      | rlilp1f1 | Park et al., (2019)        |
| UKESM1-0-LL | 750               | 196001-270912      | rlilp1f2 | Sellar et al., (2019)      |

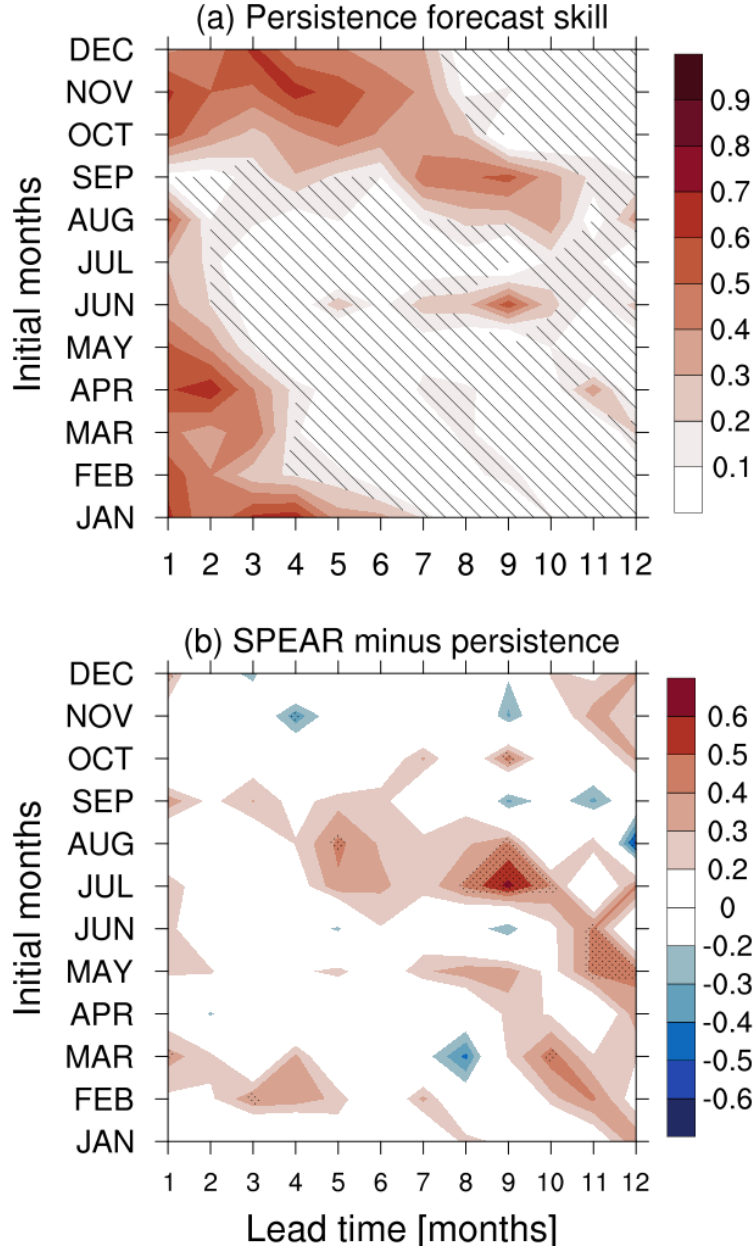

**Supplementary Figure 1:** **a)** Anomaly correlation (AC) skill for area-averaged VPD anomalies in the southwestern US as a function of initialization month (vertical axis) and forecast lead times up to 12 months (horizontal axis). AC skill is computed based on the entire 1992–2022 period using verification datasets from ERA5 reanalysis. Forecasts were generated from the persistence forecasting tool. **b)** AC skill difference between the SPEAR seasonal forecast system as illustrated in Fig. 1D in the text and the persistence forecasting tool. Hatching in **a** indicates correlation coefficients not statistically significant at the 95% significance level following Ref<sup>11</sup>. Stippling in **b** indicates correlation coefficients are statistically significant different at the 95% significance level.

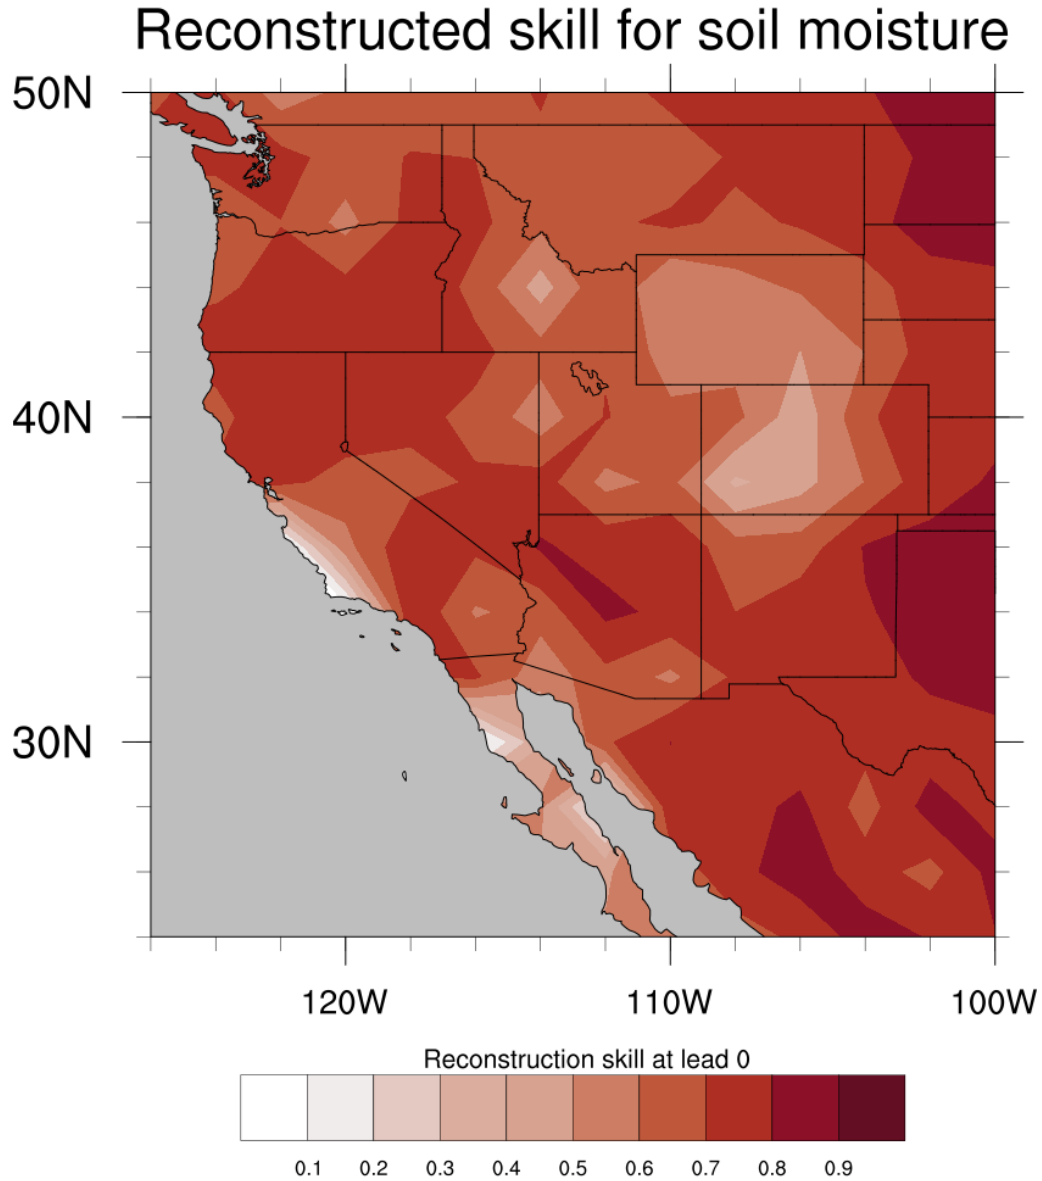

**Supplementary Figure 2:** Reconstruction skill map of monthly depth-averaged soil moisture (SM) anomalies down to 100 centimeters at the initial month (lag=0) when SM model-analogs are selected. The SPEAR pre-industrial control simulation constitutes the model-analog library. The top 15 analogs from the SPEAR model are selected as the ensemble members.

## References for supplementary materials

1. Wu, T. *et al.* BCC BCC-CSM2MR model output prepared for CMIP6 CMIP piControl. Earth System Grid Federation <https://doi.org/10.22033/ESGF/CMIP6.3016> (2018).
2. Swart, N. C. *et al.* The Canadian Earth System Model version 5 (CanESM5.0.3). *Geosci. Model Dev.* **12**, 4823–4873 (2019).
3. Danabasoglu, G. *et al.* The Community Earth System Model Version 2 (CESM2). *Journal of Advances in Modeling Earth Systems* **12**, e2019MS001916 (2020).
4. Held, I. M. *et al.* Structure and Performance of GFDL’s CM4.0 Climate Model. *Journal of Advances in Modeling Earth Systems* **11**, 3691–3727 (2019).
5. Krasting, J. P. *et al.* NOAA-GFDL GFDL-ESM4 model output prepared for CMIP6 CMIP. Earth System Grid Federation <https://doi.org/10.22033/ESGF/CMIP6.1407> (2018).
6. Kelley, M. *et al.* GISS-E2.1: Configurations and Climatology. *Journal of Advances in Modeling Earth Systems* **12**, e2019MS002025 (2020).
7. Tatebe, H. *et al.* Description and basic evaluation of simulated mean state, internal variability, and climate sensitivity in MIROC6. *Geosci. Model Dev.* **12**, 2727–2765 (2019).
8. Yukimoto, S. *et al.* MRI MRI-ESM2.0 model output prepared for CMIP6 CMIP. Earth System Grid Federation <https://doi.org/10.22033/ESGF/CMIP6.621> (2019).
9. Park, S., Shin, J., Kim, S., Oh, E. & Kim, Y. Global Climate Simulated by the Seoul National University Atmosphere Model Version 0 with a Unified Convection Scheme (SAM0-UNICON). *Journal of Climate* **32**, 2917–2949 (2019).
10. Sellar, A. A. *et al.* UKESM1: Description and Evaluation of the U.K. Earth System Model. *Journal of Advances in Modeling Earth Systems* **11**, 4513–4558 (2019).
11. Davis, R. E. Predictability of Sea Surface Temperature and Sea Level Pressure Anomalies over the North Pacific Ocean. *Journal of Physical Oceanography* **6**, 249–266 (1976).
